# Supplementary material for: Geospatial heterogeneity of hotspots for incidence and late-stage diagnosis of breast, colorectal, and lung cancer
Source: Research Square preprint supplement (doi:10.21203/rs.3.rs-7330140/v1), 2025-08-22
Supplement: Supplementary file 2 [file f15033f052b94b1e8c4ad722.docx]

**Supplemental Table 1.** Age range groups for breast, colorectal and lung cancer hotspot analysis

|  | **Breast** | **Colorectal** | **Lung** |
| --- | --- | --- | --- |
| Group 1 | 18-49 | 18-49 | 18-49 |
| Group 2 | 50-74 | 50-84 | 50-79 |
| Group 3 | >75 | >85 | >80 |
